# Supplementary material for: Cognitive process underlying ultimatum game: An eye-tracking study from a dual-system perspective
Source: PubMed Central journal article supplement (PMC9552838; doi:10.3389/fpsyg.2022.937366), 2022-09-27
Supplement: Table_1.pdf [file Table_1.pdf]

---

**Supplemental Material for**  
**The cognitive process underlying ultimatum game: An eye-tracking study from a dual-**  
**system perspective**

---

**Table S1** Experimental stimuli in the experiment.

| Type              | Item | Responder | Proposer |
|-------------------|------|-----------|----------|
| inclusive payoffs | 1    | 23        | 7        |
|                   | 2    | 15        | 15       |
|                   | 3    | 20        | 10       |
|                   | 4    | 16        | 14       |
|                   | 5    | 21        | 9        |
|                   | 6    | 25        | 5        |
|                   | 7    | 18        | 12       |
|                   | 8    | 17        | 13       |
|                   | 9    | 22        | 8        |
|                   | 10   | 19        | 11       |
| exclusive payoffs | 1    | 9         | 21       |
|                   | 2    | 4         | 26       |
|                   | 3    | 6         | 24       |
|                   | 4    | 10        | 20       |
|                   | 5    | 7         | 23       |
|                   | 6    | 8         | 22       |
|                   | 7    | 2         | 28       |
|                   | 8    | 5         | 25       |
|                   | 9    | 1         | 29       |
|                   | 10   | 3         | 27       |

---
